# Supplementary material for: Immunoinformatics-Aided Design and Evaluation of a Potential Multi-Epitope Vaccine against Klebsiella Pneumoniae
Source: MDPI journal article supplement (doi:10.3390/vaccines7030088), 2019-08-12

# AIRs vs i-RMSD

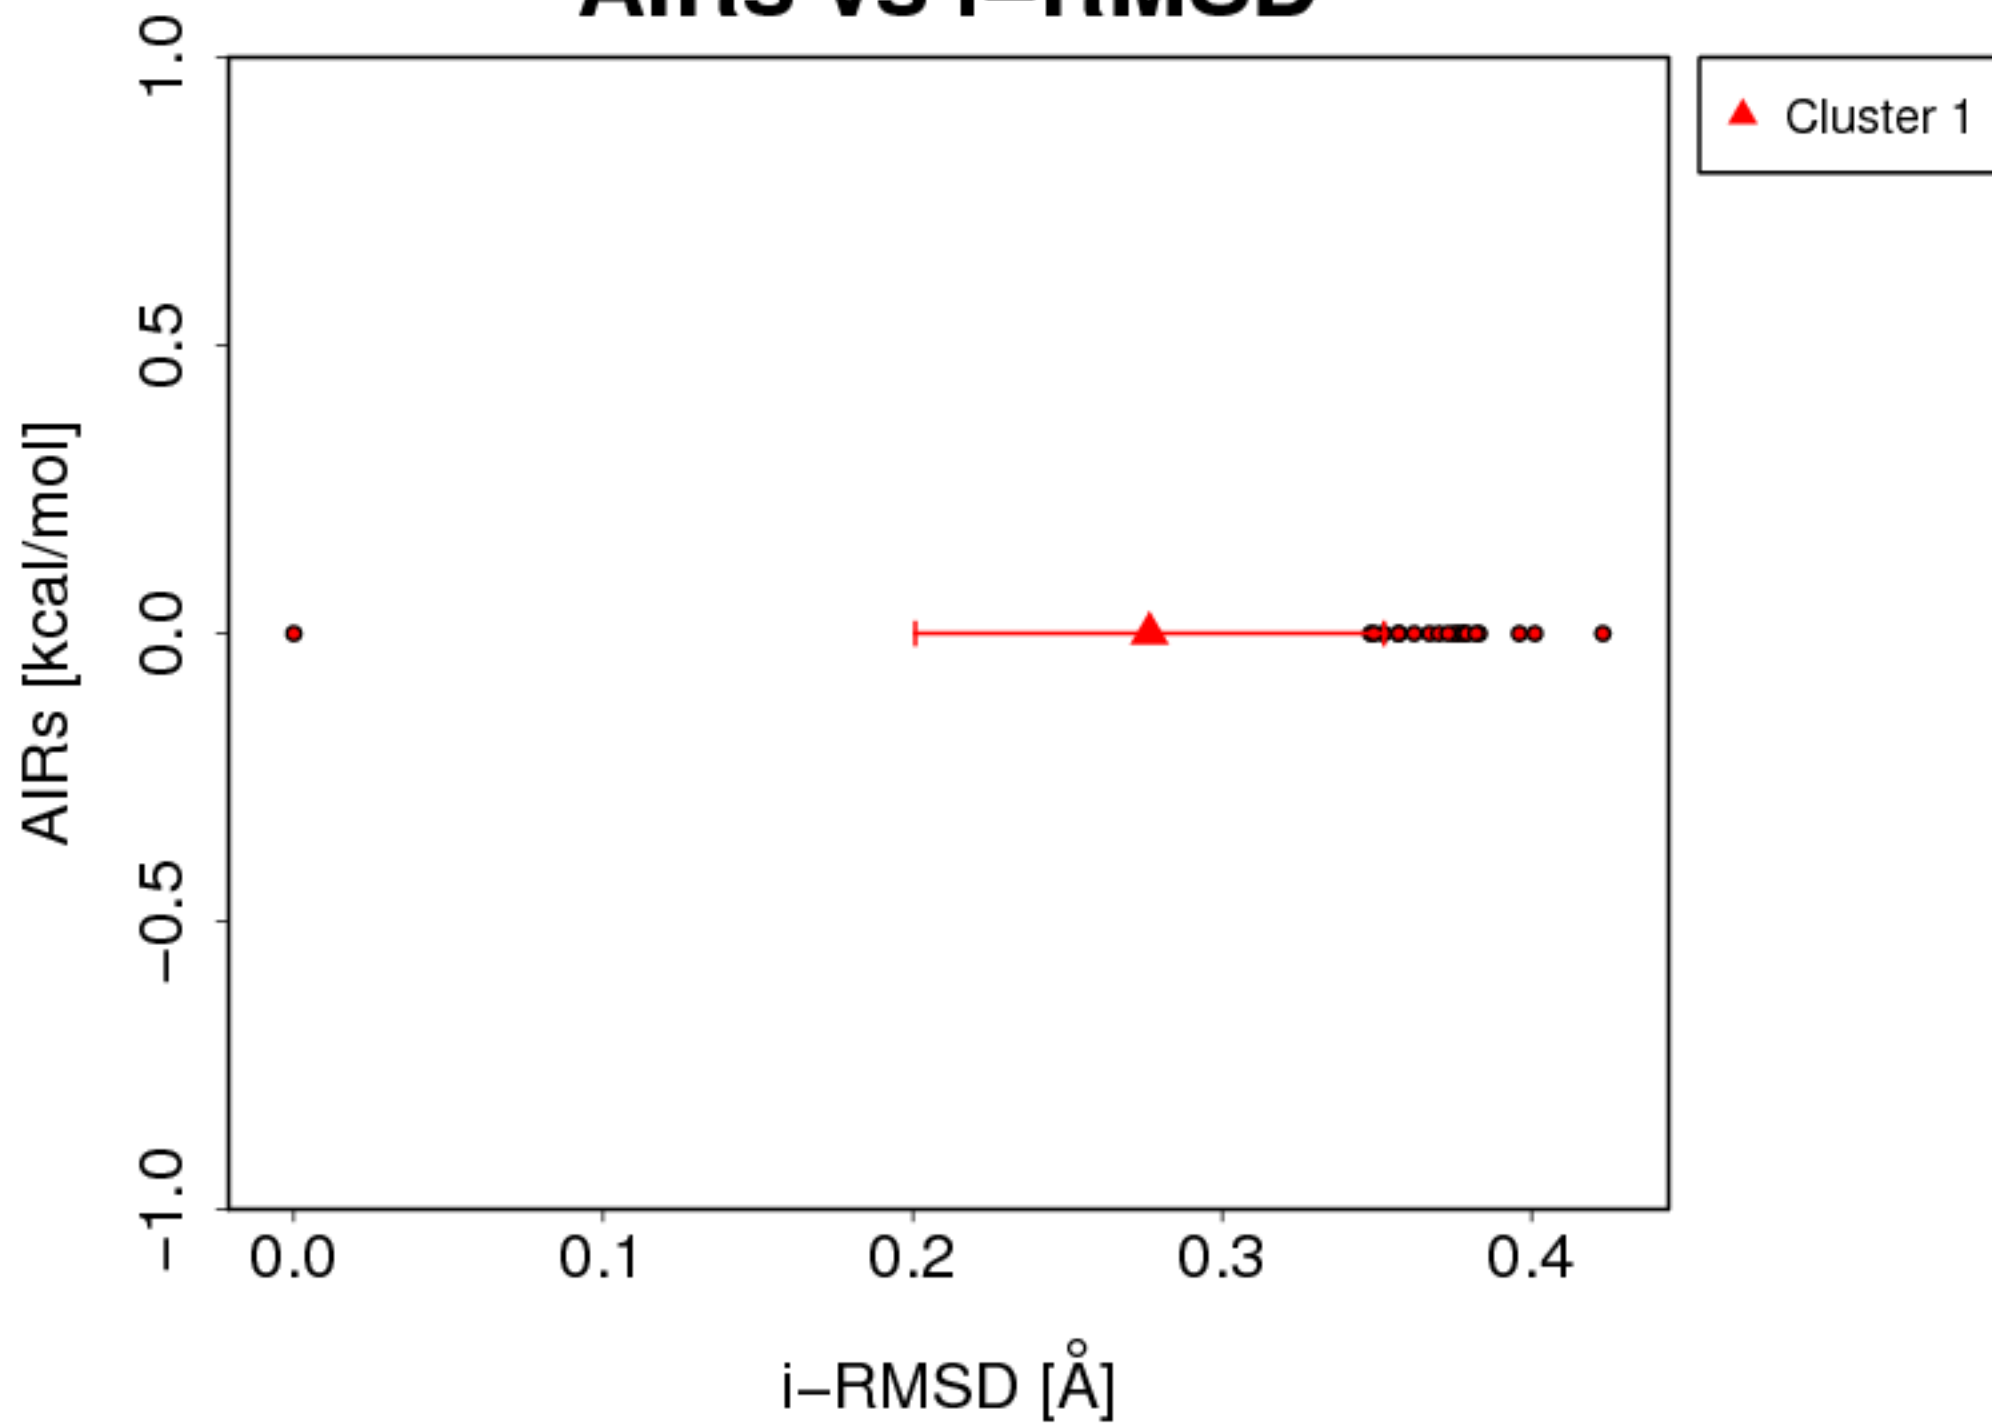

# Electrostatics vs i-RMSD

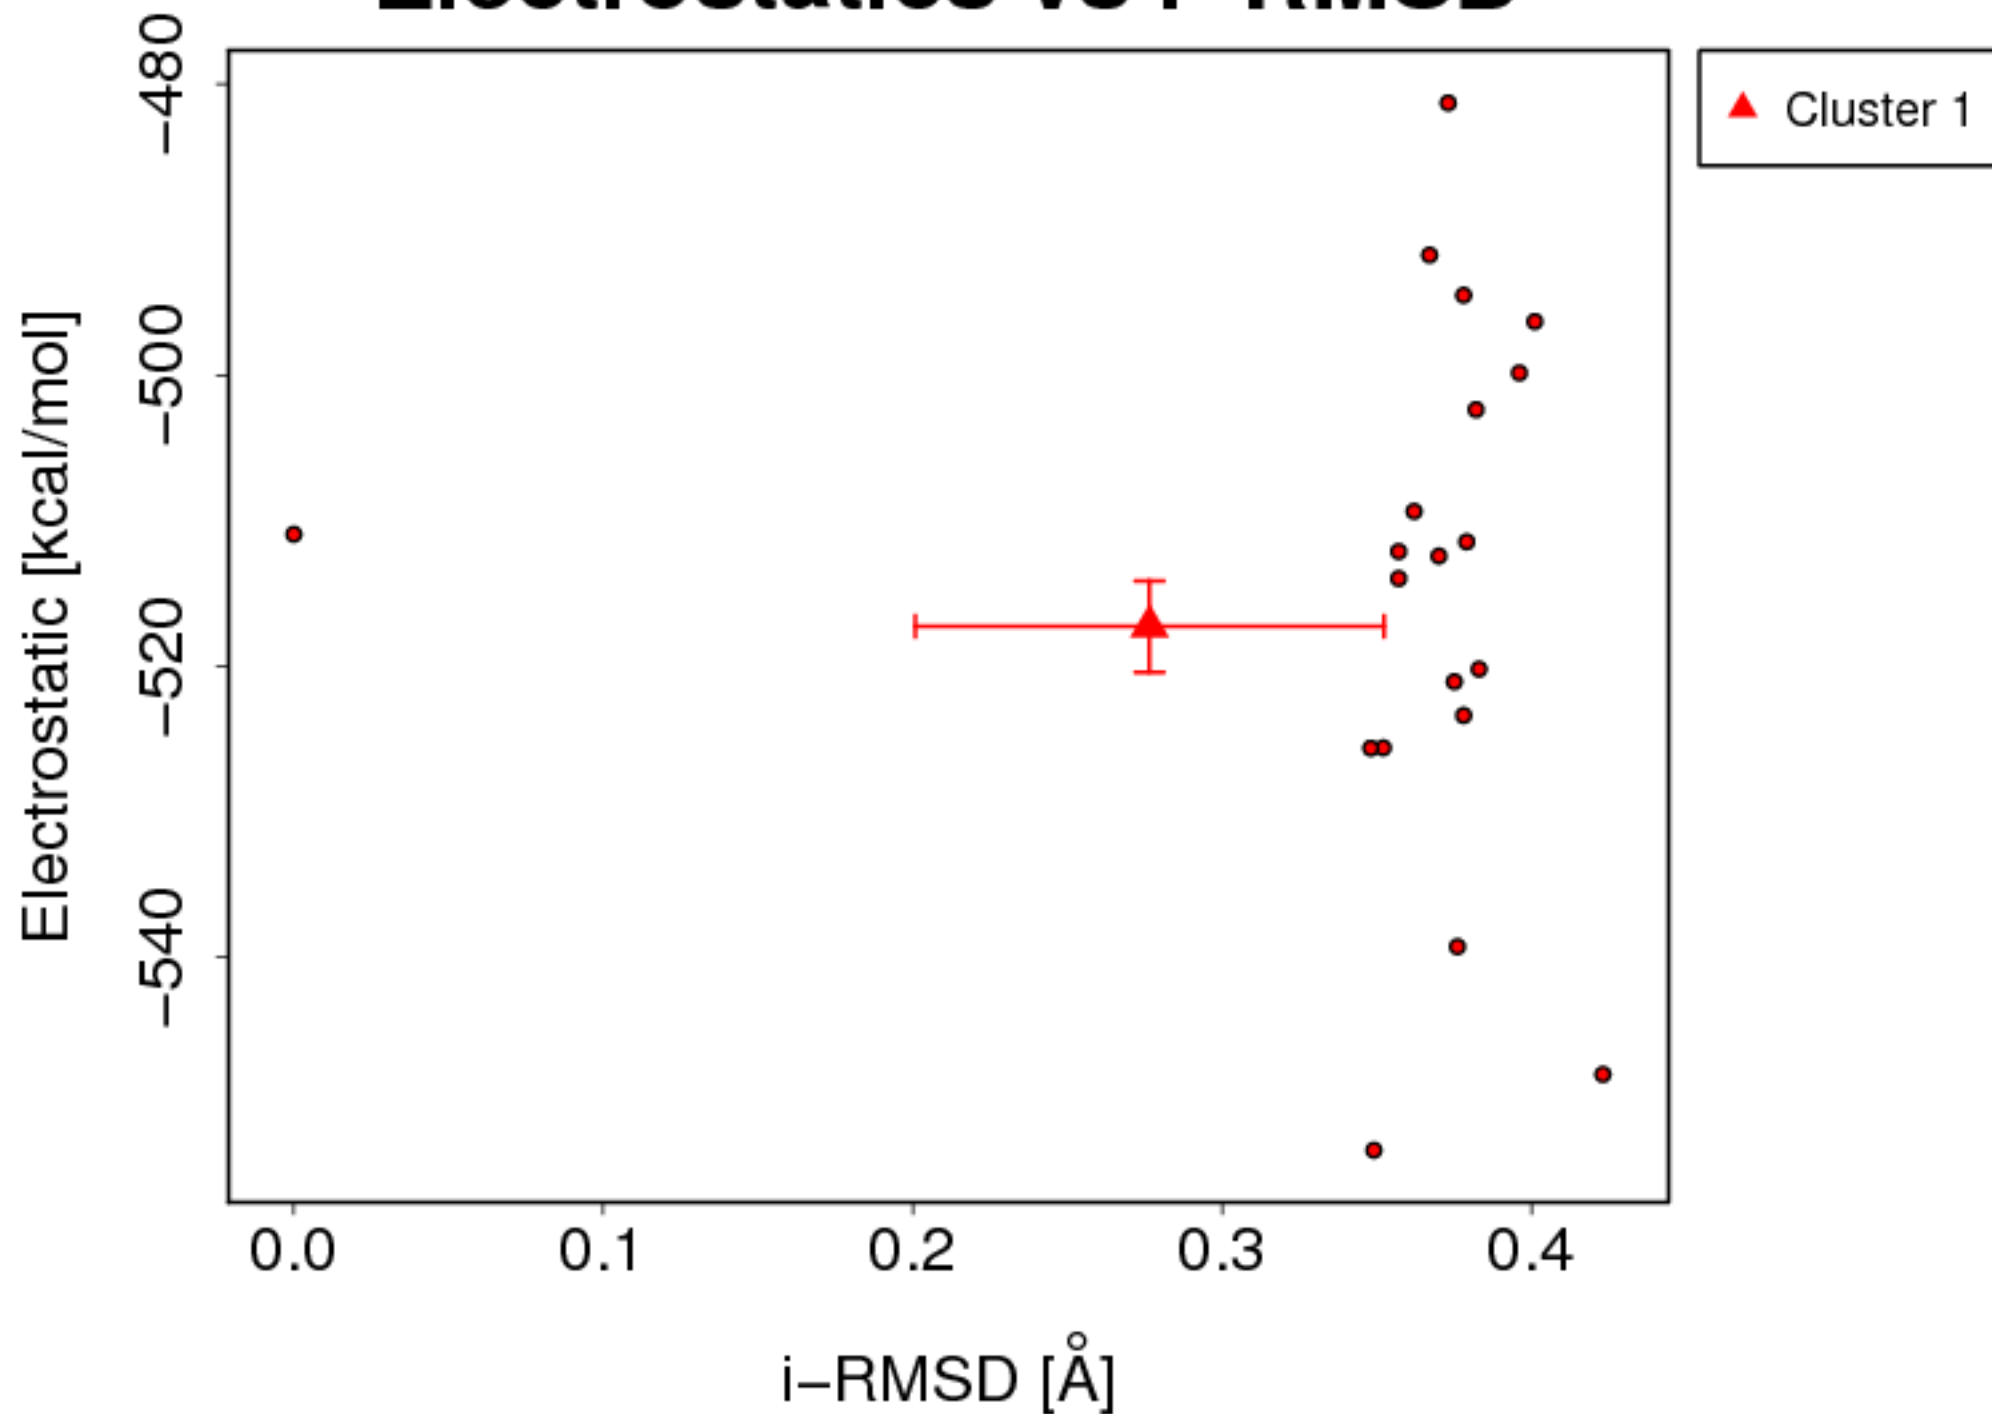

# HADDOCK score vs FCC

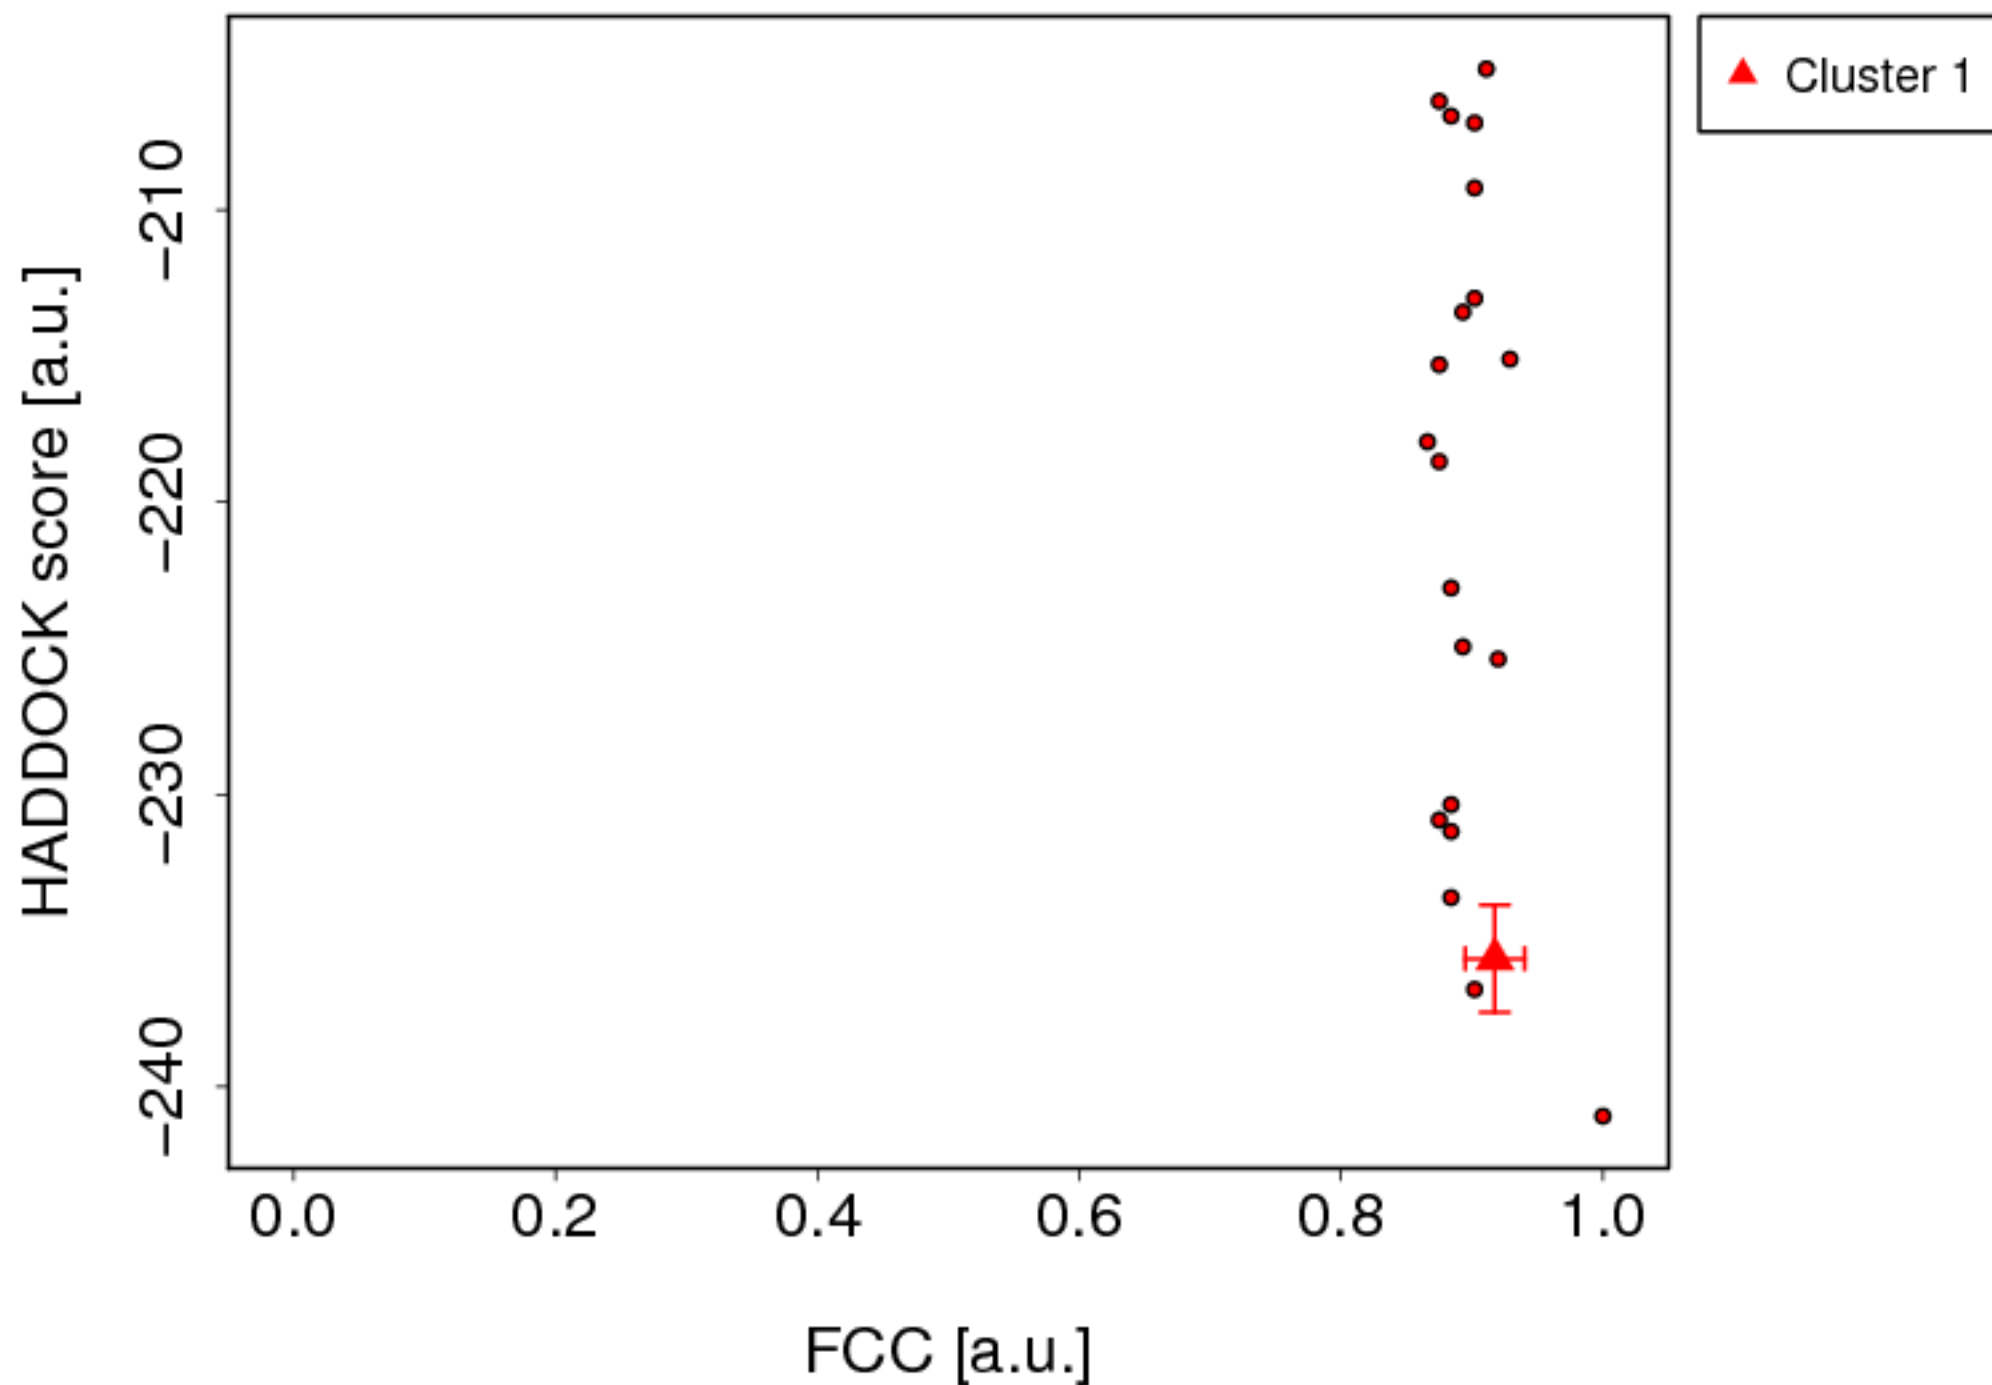

# HADDOCK score vs i-l-RMSD

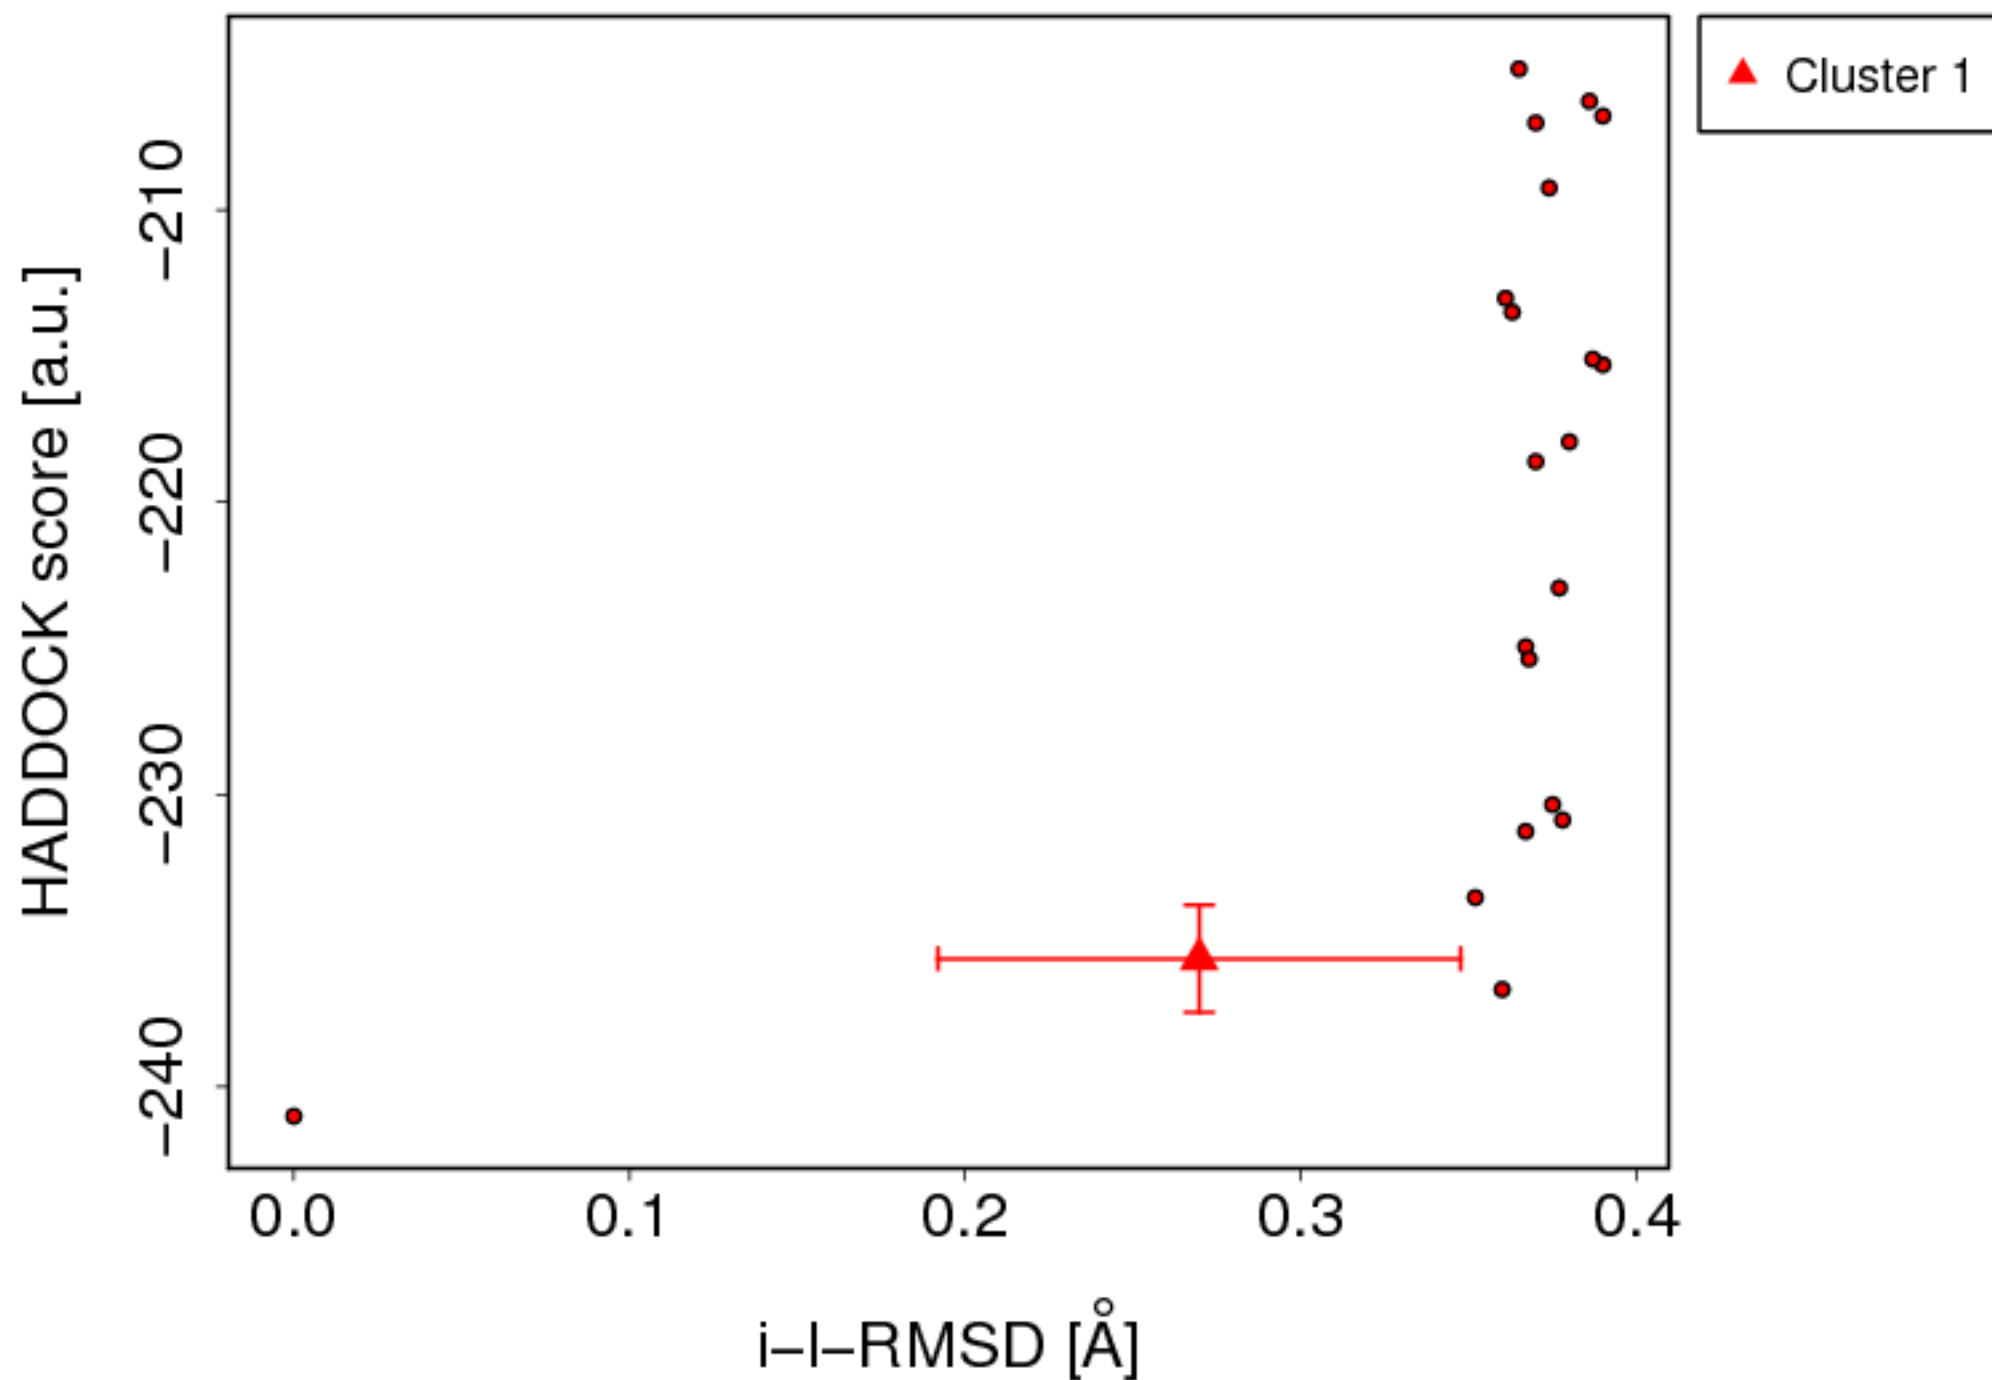

# HADDOCK score vs i-RMSD

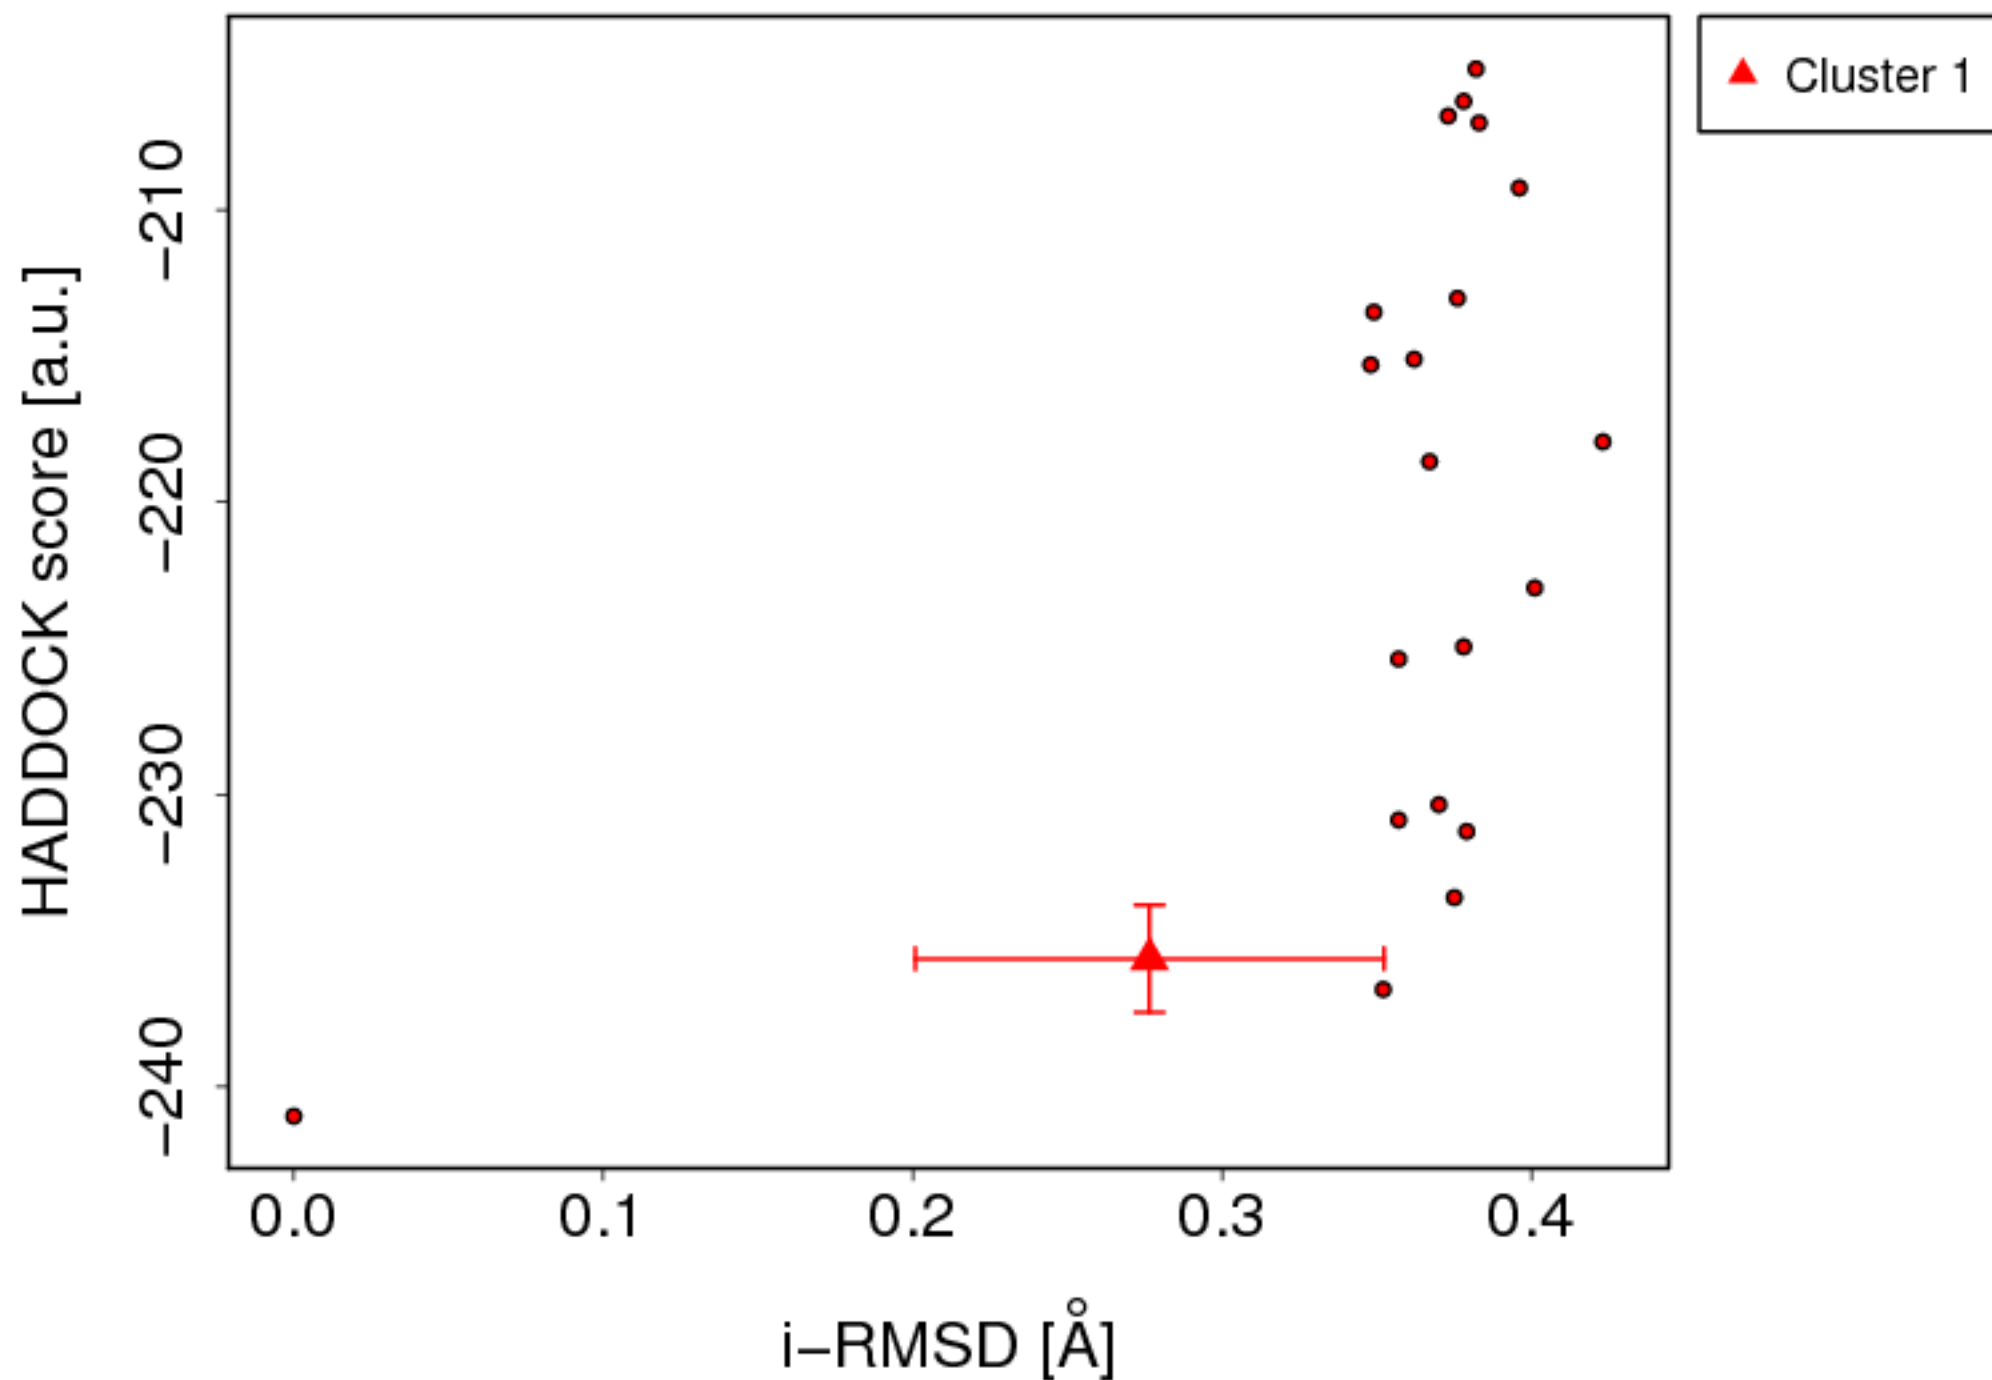



# van der Waals vs i-RMSD

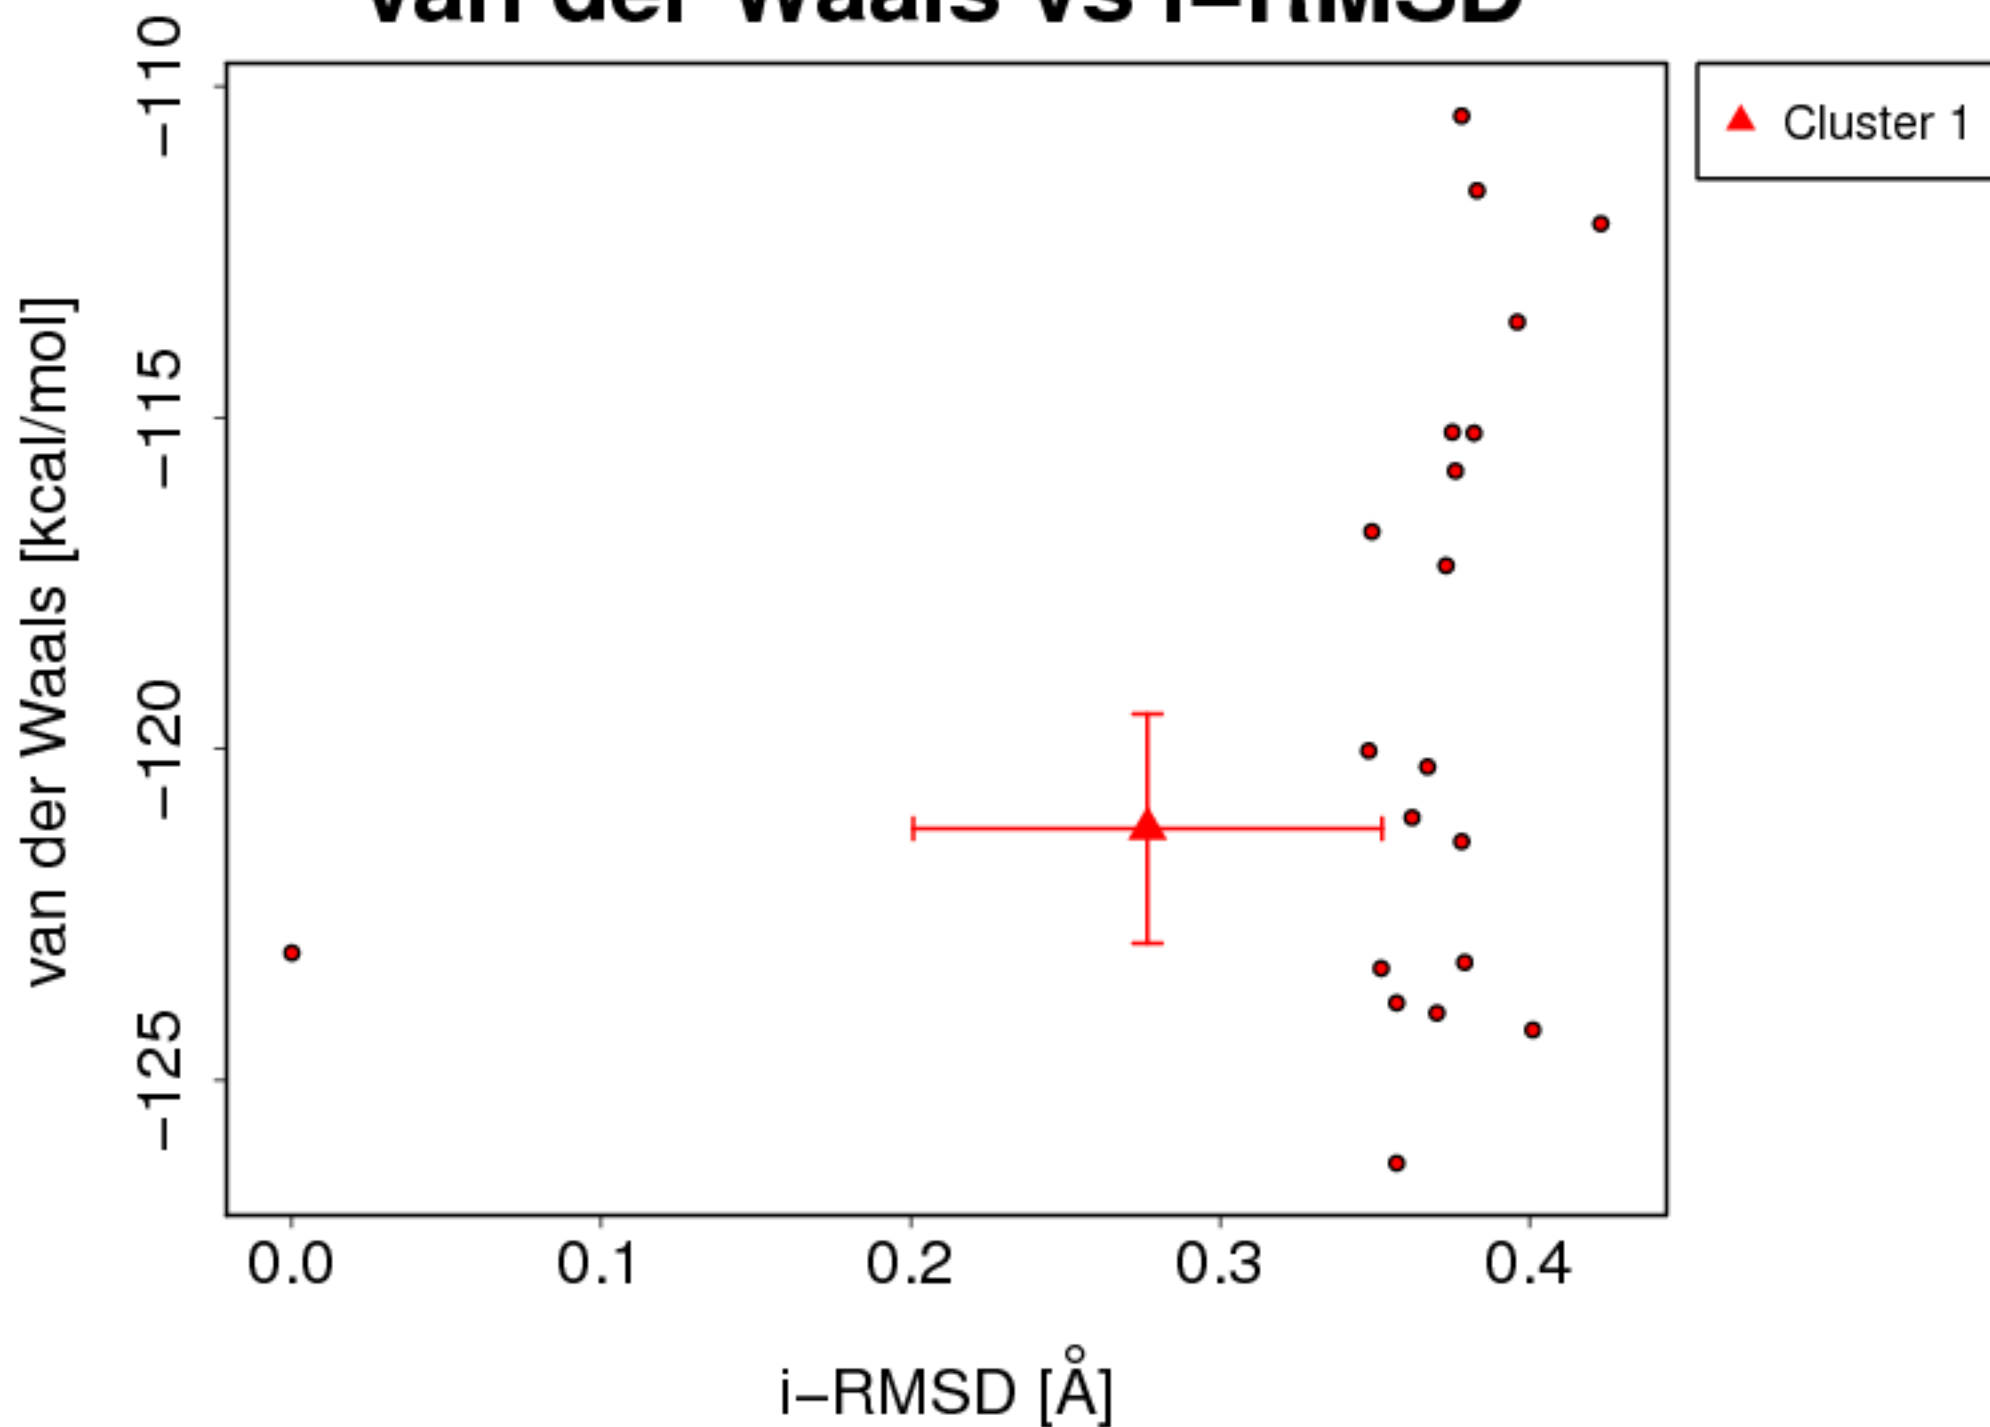

Supplement: s2 [file s2]
